# Supplementary material
Source: Springer Nature journal article supplement (https://www.springermedizin.de/resource/supplementary/13014_2009_228_MOESM2_ESM.pdf/9633226)

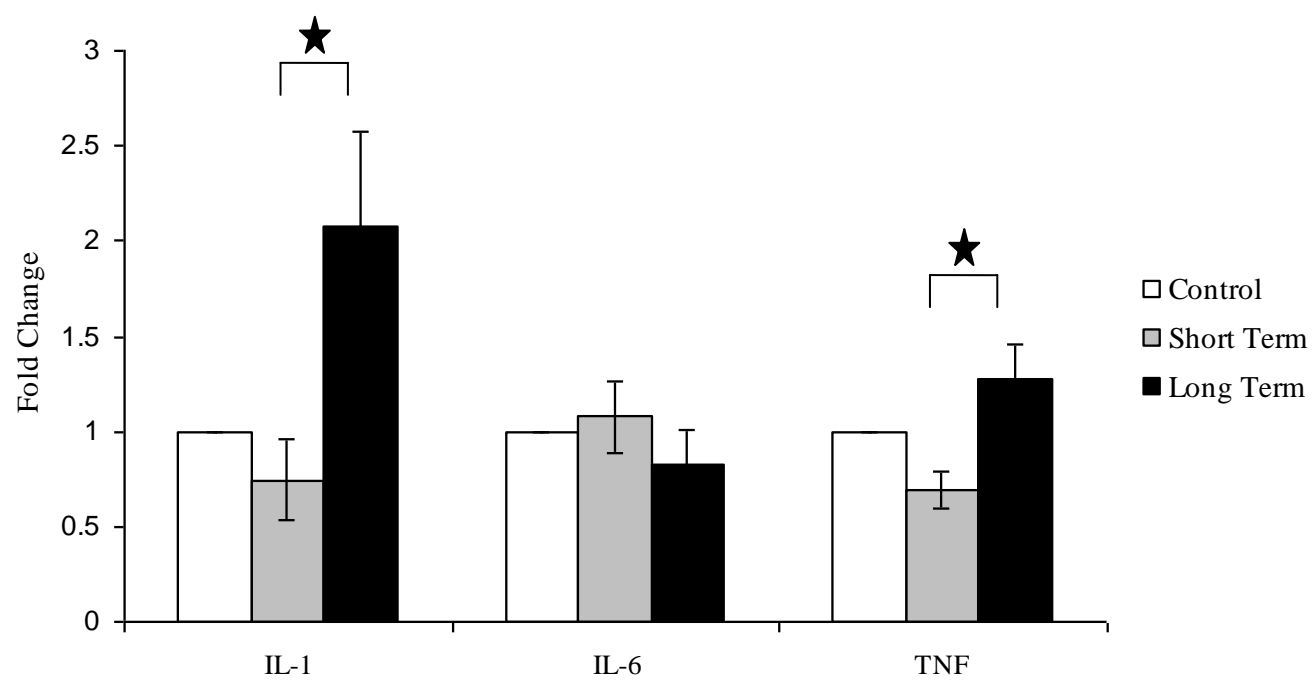

Supplement: MOESM2 [file 9633226]
